# Supplementary material
Source: Royal Society of Chemistry journal article supplement (doi:10.1039/d6ay00848h)
Supplement: d6ay00848h1.pdf [file d6ay00848h1.pdf]

## Supporting Information (SI)

### **A centrifugal microfluidic chip for rapid nucleic acid detection of chili pepper viruses**

Yan Qing,<sup>a</sup> Hai-Bo Wang,<sup>b</sup> Qin Huang,<sup>a</sup> Qing-Liu,<sup>b</sup> Lei Xie,<sup>a</sup> Yi-Mei Wu,<sup>a</sup> Xin Lu,<sup>c</sup> Qun-Ying Zhao,<sup>c</sup> Ya-Jing Dong,<sup>c</sup> Man Li,<sup>c</sup> Ru-Qin Yu,<sup>b</sup> Hao Tang<sup>\*b</sup>

a-Hunan R&G BIOTECH CO., LTD, Changsha, P. R. China

b-State Key Laboratory of Chemo and Biosensing, College of Chemistry and Chemical Engineering, Hunan University, Changsha, 410082, P. R. China

c-HUNAN XIANGYAN SEED INDUSTRY CO., LTD, Changsha, P. R. China

\*Correspondence: haotang@hnu.edu.cn

## *Table of contents*

- S-3: Table S1. The primer sequences used in RT-LAMP assay for viral RNA detection.
- S-4: Figure S1. The amplification results of the microfluidic chip RT-LAMP assay utilizing a mixture of six types of standard plasmids.
- S-5: Figure S2. The time-to-positivity (Tp) values of the microfluidic chip RT-LAMP assay utilizing different concentrations of standard plasmids.
- S-6: Figure S3. The reproducibility (inter-assay precision) investigation of the method.
- S-7: Figure S4. The semi-logarithmic regression between the Tp values and standards concentration of different plasmids
- S-8: Table S2. The LOD of microfluidic chip RT-LAMP assay for standard plasmids with highly conserved region detection of different types of viruses.
- S-9: Table S3. The primer sequences used in RT-PCR assay for viral RNA detection.
- S-10: Figure S5. Microfluidic chip RT-LAMP results for RNA viruses in three representative leaf tissue samples collected from seedlings germinated from pepper seeds.
- S-11: Figure S6. Results of viral RNA detection in leaf tissues from 100 chili pepper seed samples using the RT-PCR assay.
- S-12. Figure S7. Results of viral RNA detection in leaf tissues from 100 chili pepper seed samples with trisodium phosphate treatment using the developed microfluidic chip RT-LAMP assay.

**Table S1.** The primer sequences used in RT-LAMP assay for viral RNA detection.

| virus target | Primer name | Sequence (5'-3')                                       |
|--------------|-------------|--------------------------------------------------------|
| ToBRFV       | ToBRFV-F3   | ACTAATTCAGTACTAGGTAATCAATTCC                           |
|              | ToBRFV-B3   | TTTCTAGTATCGAAAGCTCCTA                                 |
|              | ToBRFV-FIP  | GACTTGAGGGACAGGTTTCCAAACACAACAAGCTAGAACAA              |
|              | ToBRFV-BIP  | GTCAGTGTAGGTTTCTGACAGCAAAGCAGTAACTAGAGGATC<br>T        |
|              | ToBRFV-LF   | GTTCAACGGCAATTTAG                                      |
|              | ToBRFV-LB   | TTAAGGTGTATAGGTACAATGCGG                               |
| PepMV        | PepMV-F3    | GGAAAAACAGCGAAAGCAC                                    |
|              | PepMV-B3    | AGATTCTCAAGGGTGTCTG                                    |
|              | PepMV-FIP   | ACTGTACTTGTGGGTCTCTGATCTTTACCACATTATGTCTCGTG           |
|              | PepMV-BIP   | AGCATTTCGGAAGCCGCATACATTAAGCGCATAAGGACAAT              |
|              | PepMV-LF    | TTTCCAAAGTATTCCT                                       |
|              | PepMV-LB    | CAACATGTTTCGACCCGACTTAA                                |
| ToMMV        | ToMMV-F3    | GGAGAGTTATGGAGTTAGTGAT                                 |
|              | ToMMV-B3    | AGTCCTTGCTTGTGTGTT                                     |
|              | ToMMV-FIP   | ACGGAGAAGTAATAGCGTAAGACATGATAATTTGATTGAAGATG<br>ATACCG |
|              | ToMMV-BIP   | TCGTGTTTTTATCATCAGCATGGGTGAAACTGGTTACCTAACGAA          |
|              | ToMMV-LF    | ATCCCGCGACTGACGTC                                      |
|              | ToMMV-LB    | GTTTTTATCATCAGCA                                       |
| ToRSV        | ToRSV-F3    | ACATTTATCAGCGCCTGG                                     |
|              | ToRSV-B3    | ACTTCGAAAACTCTCTGCC                                    |
|              | ToRSV-FIP   | TGCACATATGCCTGGTAATTGAGTCAGTGGCCTTGAATTGTG             |
|              | ToRSV-BIP   | TACAACGATGAACATTCTATCGTGCACACACACTCCACCTACC            |
|              | ToRSV-LF    | AGCCCATCAAAGCGACTATA                                   |
|              | ToRSV-LB    | GTGGCAATCTTTTGATGG                                     |
| TSWV         | TSWV-F3     | GGCTTGATAGCTTGATCAGG                                   |
|              | TSWV-B3     | ATAGCCAAGACAACACTGA                                    |
|              | TSWV-FIP    | GGTGGGAAGCAATCTTAGATTTGATGTCAGGCTTGTAGAGGAAA<br>C      |
|              | TSWV-BIP    | TTGATGATGCAAAGTCTGTGAGGCATCTCAAAGCTATCAACTGA<br>A      |
|              | TSWV-LF     | GTAATCCATAGGCTTGAATCA                                  |
|              | TSWV-LB     | TGCCATAATGCTGGGAGGT                                    |
| PMMoV        | PMMoV-F3    | TTTAGGTTCTGTATGGGCC                                    |
|              | PMMoV-B3    | AGAATCTAGCACGGCATT                                     |
|              | PMMoV-FIP   | GTAGTTCTAGCCTGCTGTGTTTCAAATTACAAAATCTATGTACTT<br>CGGC  |
|              | PMMoV-BIP   | GGTTCAACAGCAGTTCTCTGATGGGAAAACCTTCAAACAGTAG<br>C       |
|              | PMMoV-LF    | AACTGATTACCTAAC                                        |
|              | PMMoV-LB    | GAAGACCATACCGACCGCT                                    |
| rbcL         | rbcL-F3     | CCAAGGATACTGATATATTGGCA                                |
|              | rbcL-B3     | AGGGTAAGCTACATAAGCAATA                                 |
|              | rbcL-FIP    | AGAAGATTCGGCAGCTACCGGCATTCCGAGTAACTCCTC                |
|              | rbcL-BIP    | GACAACGTATGGACCGATGGATTCTCCAACAACACGCTC                |
|              | rbcL-LF     | TTCAGGTGGAACCTCCAGGTT                                  |
|              | rbcL-LB     | ACCAGTCTTGATCGTTACAAAGGGC                              |

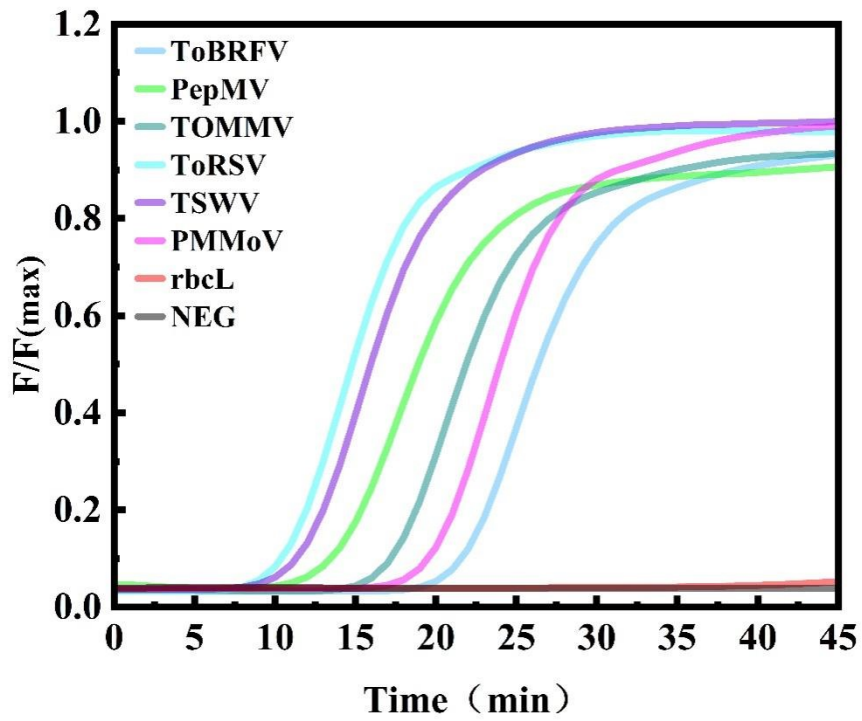

**Figure S1.** The amplification results of the microfluidic chip RT-LAMP assay utilizing a mixture of six types of standard plasmids with highly conserved region from the viruses of ToBRFV, PepMV, ToMMV, ToRSV, TSWV and PMMoV respectively.

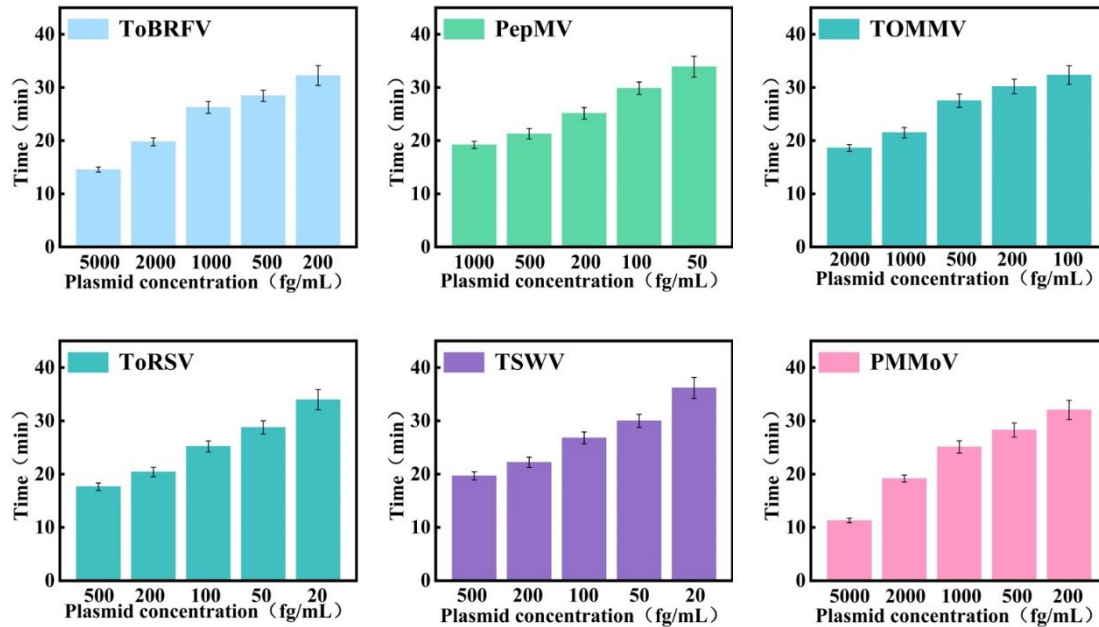

**Figure S2.** The time-to-positivity ( $T_p$ ) values of the microfluidic chip RT-LAMP assay utilizing different concentrations of standard plasmids with highly conserved region from the viruses of (a) ToBRFV; (b) PepMV; (c) TOMMV(d) ToRSV; (e) TSWV and (f) PMMoV. The error bars are standard deviations across six repetitive trials.

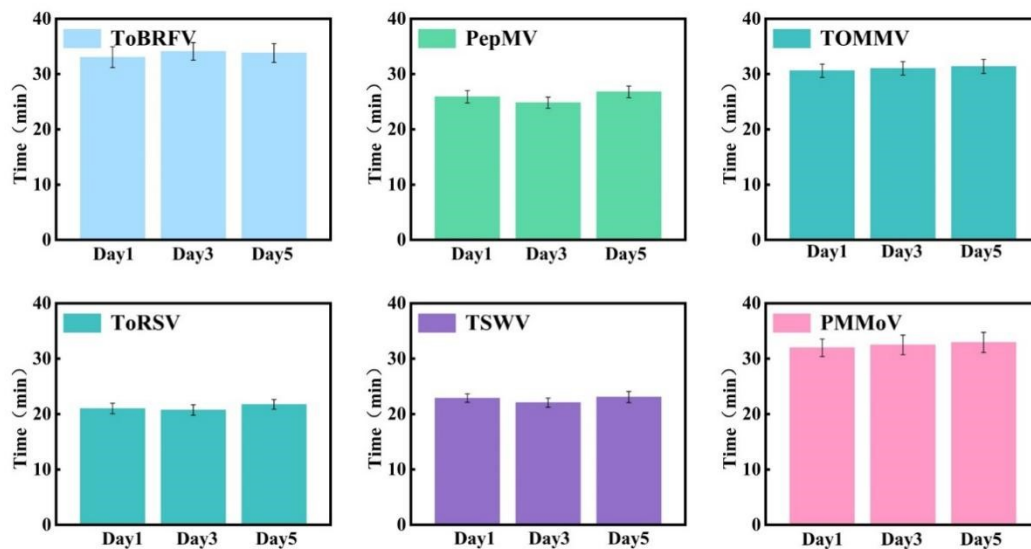

**Figure S3.** The reproducibility (inter-assay precision) investigation via testing samples containing all plasmids at same concentration of 200 fg/mL on different dates. The error bars are standard deviations across six repetitive trials.

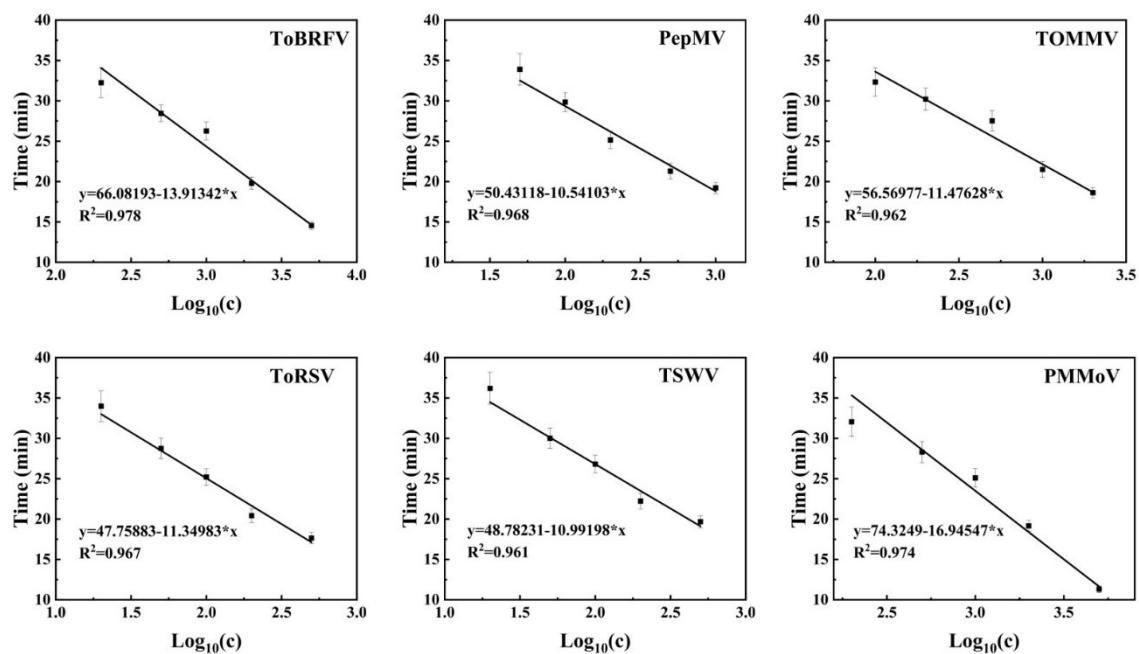

**Figure S4.** The semi-logarithmic regression between the Tp values and standards concentration of different plasmids(fg/mL). The error bars are standard deviations across six repetitive trials.

**Table S2.** The LOD of microfluidic chip RT-LAMP assay for standard plasmids with highly conserved region detection of different types of viruses.

| Type of virus | LOD (fg/mL) |
|---------------|-------------|
| ToBRFV        | 200         |
| PepMV         | 50          |
| ToMMV         | 100         |
| ToRSV         | 20          |
| TSWV          | 20          |
| PMMoV         | 200         |

**Table S3.** The primer sequences used in RT-PCR assay for viral RNA detection.

| <b>virus target</b> | <b>Primer name</b> | <b>Sequence (5'-3')</b>   |
|---------------------|--------------------|---------------------------|
| ToBRFV              | ToBRFV-F           | ACTAATTCAGTAGGTAATCAATTCC |
|                     | ToBRFV-B           | TTTCTAGTATCGAAAGCTCCTA    |
| PepMV               | PepMV-F            | GCACTTTACRCATTATGTCT      |
|                     | PepMV-B            | CTTTATGHACAGCAGCTCTTC     |
| ToMMV               | ToMMV-F            | GGTGTATAGGTATAATGCGGTT    |
|                     | ToMMV-B            | TTCGAAAGTACTCTGGTTGT      |
| ToRSV               | ToRSV-F            | GACGAAGTTATCAATGGCAGC     |
|                     | ToRSV-B            | TCCGTCCAATCACGGAATA       |
| TSWV                | TSWV-F             | AGGATTGGAGCCACTGAC        |
|                     | TSWV-B             | GCTGGAGCTGAGTATAGCAG      |
| PMMoV               | PMMoV-F            | AGAACTCGGAGTCATCGGAC      |
|                     | PMMoV-B            | GAGTTATCGTACTCGCCACG      |
| rbcL                | rbcL-F             | CCTCATGGGATCCAAGTT        |
|                     | rbcL-B             | CGATCTCTCCAACGCATAA       |

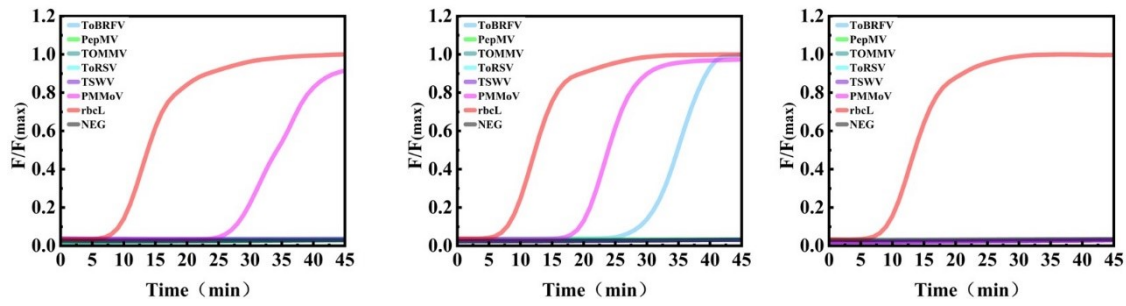

**Figure S5.** Microfluidic chip RT-LAMP results for RNA viruses in three representative leaf tissue samples collected from seedlings germinated from pepper seeds. (A) Co-infection with PMMoV and ToBRFV; (B) PMMoV infection only; (C) no detectable amplification for any of the six viruses tested.

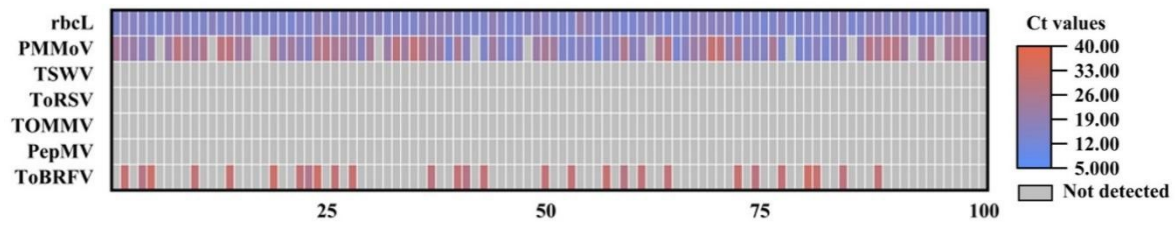

**Figure S6.** Results of viral RNA detection in leaf tissues from 100 chili pepper seed samples using the RT-PCR assay. The x-axis shows the sample (infected plant) number, and the y-axis lists the six target viruses and the rbcL internal control. The color scale represents the Ct values, whereas gray indicates no detectable amplification.

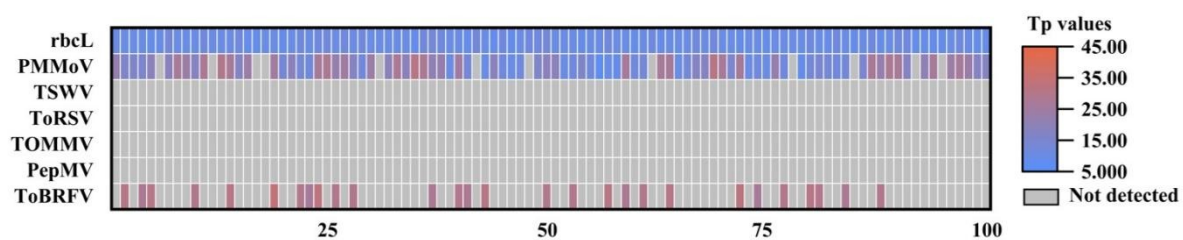

**Figure S7.** Results of viral RNA detection in leaf tissues from 100 chili pepper seed samples with trisodium phosphate treatment using the developed microfluidic chip RT-LAMP assay. The x-axis shows the sample (infected plant) number, and the y-axis lists the six target viruses and the rbcL internal control. The color scale represents the time-to-positivity (Tp) values, whereas gray indicates no detectable amplification.
